# Supplementary material
Source: PubMed Central journal article supplement (PMC6327106)
Supplement: mmc1.pdf [file mmc1.pdf]

**Molecular Cell, Volume 73**

## **Supplemental Information**

### **Inhibiting the Evolution of Antibiotic Resistance**

**Mark N. Ragheb, Maureen K. Thomason, Chris Hsu, Patrick Nugent, John Gage, Ariana N. Samadpour, Ankunda Kariisa, Christopher N. Merrikh, Samuel I. Miller, David R. Sherman, and Houra Merrikh**

# Figure S1

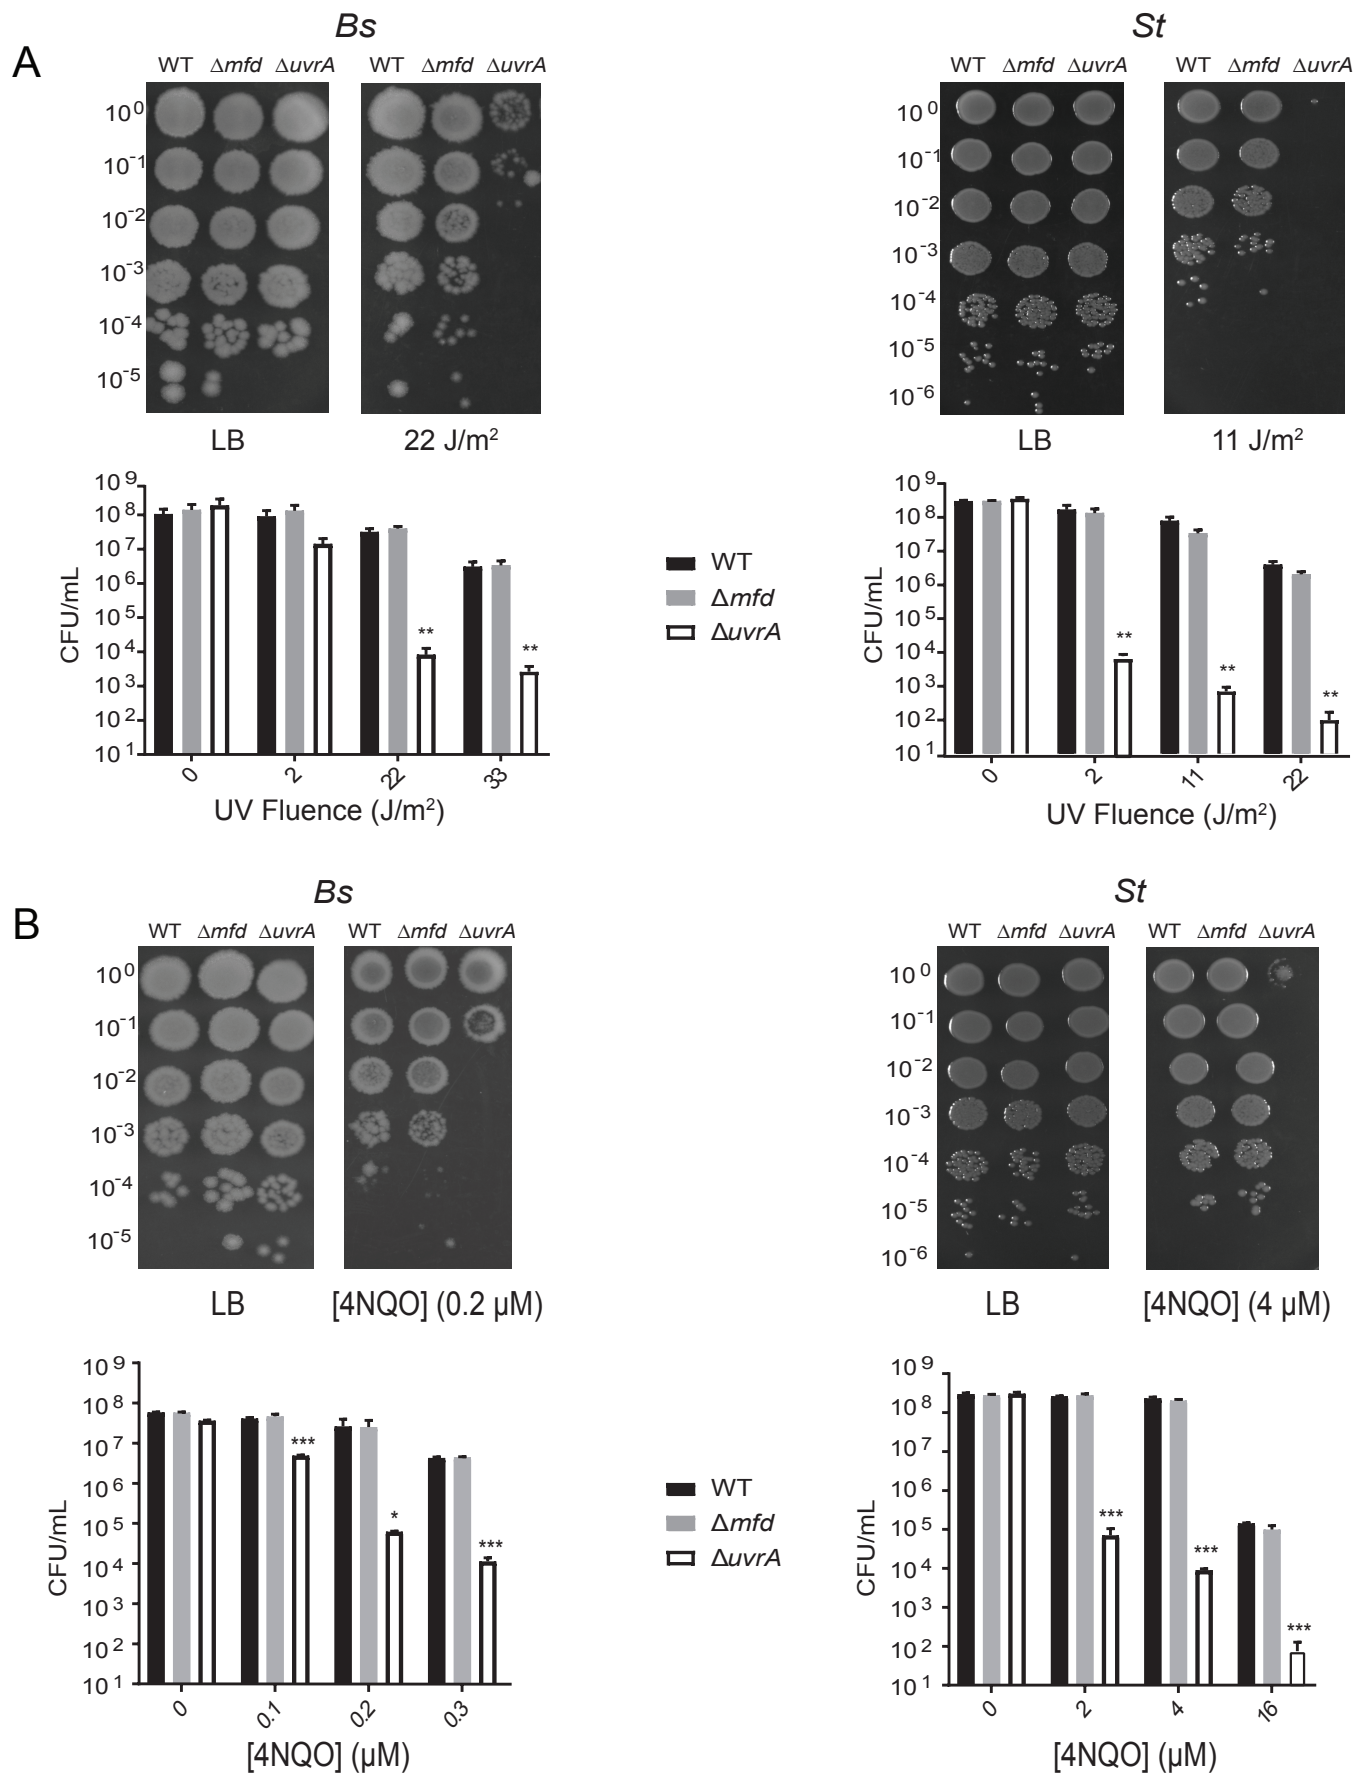

**Figure S1. Cells lacking Mfd are not significantly sensitive to DNA damaging agents, Related to Figure 1** Survival assays to (A) UV damage and (B) 4NQO for WT,  $\Delta mfd$ , and  $\Delta uvrA$  strains of *B. subtilis* HM1 (*Bs*) and *S. typhimurium* ST19 (*St*). (*uvrA* knockouts, known to be sensitive to DNA damage, were included for comparison to *mfd* knockouts). Data represents at least two independent experiments with duplicates for each experiment. Errors bars indicate s.e.m. Statistical significance was determined using two-tailed Student's t-test (\*p-value <0.05, \*\*p-value <0.01, \*\*\*p-value <0.001).

# Figure S2

A

Rifampicin

Rifampicin

|              |       |       |       |       |       |
|--------------|-------|-------|-------|-------|-------|
| No mutations |       |       |       |       |       |
| No mutations |       |       |       |       |       |
|              |       |       | I572S | I572S |       |
| G536V        | G536V | G536V | G536V | G536V |       |
| S574F        | S574F | S574F | S574F | S574F |       |
| I572F        | I572F | I572F | I572F | I572F | I572F |
| I572F        | I572F | I572F | I572F | I572F | I572F |
| S512F        | S512F | S512F | S512F | S512F | S512F |
|              |       | H526Y | H526Y | H526Y | H526Y |
| I572F        | I572F | I572F | I572F | I572F | I572F |
|              |       | D516E | D516E | D516E | D516E |
| S512P        | S512P | S512P | S512P | S512P | S512P |
|              | L511Q | L511Q | L511Q | L511Q | L511Q |
| Q148L        | Q148L | Q148L | Q148L | Q148L | Q148L |
|              | I572S | I572S | I572S | I572S | I572S |
| L511Q        | L511Q | L511Q | L511Q | L511Q | L511Q |
| D516G        | D516G | D516G | D516G | D516G | D516G |
| Q513H        | Q513H | Q513H | Q513H | Q513H | Q513H |
| D516G        | D516G | D516G | D516G | D516G | D516G |

WT replicates

$\Delta mfd$  replicates

|              |  |  |       |       |       |       |   |
|--------------|--|--|-------|-------|-------|-------|---|
| No mutations |  |  |       |       |       | *     |   |
|              |  |  |       |       |       | L511P | * |
|              |  |  |       |       |       | D516G | * |
|              |  |  | I572F | I572F |       | *     |   |
|              |  |  | L538P | L538P | L538P | *     |   |
|              |  |  | H526Y | H526Y | H526Y | *     |   |
|              |  |  | I572N | I572N | I572N | *     |   |
|              |  |  | Q148L | Q148L | Q148L | *     |   |
|              |  |  | Q148L | Q148L | Q148L | *     |   |
|              |  |  | H526Y | H526Y | H526Y | *     |   |
|              |  |  | S509R | S509R | S509R | *     |   |
|              |  |  | D516G | D516G | D516G | *     |   |
|              |  |  | D516G | D516G | D516G | *     |   |
|              |  |  | Q513L | Q513L | Q513L | *     |   |
|              |  |  | Q148L | Q148L | Q148L | *     |   |
|              |  |  | Q148L | Q148L | Q148L | *     |   |
|              |  |  | Q148L | Q148L | Q148L | *     |   |
|              |  |  | Q148L | Q148L | Q148L | *     |   |
|              |  |  | I572N | I572N | I572N | *     |   |
|              |  |  | I572N | I572N | I572N | *     |   |
|              |  |  | I572N | I572N | I572N | *     |   |
|              |  |  | I572N | I572N | I572N | *     |   |
|              |  |  | I572N | I572N | I572N | *     |   |
|              |  |  | I572N | I572N | I572N | *     |   |

24 48 72 96 120 144  
Time (h)

24 48 72 96 120 144  
Time (h)

B

Trimethoprim

Trimethoprim

|  |  |  |       |       |       |       |       |       |       |   |
|--|--|--|-------|-------|-------|-------|-------|-------|-------|---|
|  |  |  |       |       |       | D27E  | *     |       |       |   |
|  |  |  |       |       |       | F153S | *     |       |       |   |
|  |  |  | M20I  | M20I  | M20I  | M20I  | D27E  | F153S | *     |   |
|  |  |  | W30G  | W30G  | W30G  | W30G  | W30G  |       |       | * |
|  |  |  | M20I  | M20I  | M20I  | M20I  | M20I  |       |       | * |
|  |  |  | F153S | F153S | F153S | F153S | F153S | F153S | D27E  | * |
|  |  |  | M20I  | M20I  | M20I  | M20I  | M20I  | M20I  | F153S | * |
|  |  |  | W30G  | W30G  | W30G  | W30G  | W30G  | W30G  | D27E  | * |
|  |  |  | M20I  | M20I  | M20I  | M20I  | M20I  | M20I  | D27E  | * |
|  |  |  | F153S | F153S | F153S | F153S | F153S | F153S | D27E  | * |
|  |  |  | M20I  | M20I  | M20I  | M20I  | M20I  | M20I  | F153S | * |
|  |  |  | F153S | F153S | F153S | F153S | F153S | F153S | D27E  | * |
|  |  |  | F153S | F153S | F153S | F153S | F153S | F153S | D27E  | * |

WT replicates

$\Delta mfd$  replicates

|              |  |  |  |  |  |       |       |       |       |       |   |   |
|--------------|--|--|--|--|--|-------|-------|-------|-------|-------|---|---|
| No mutations |  |  |  |  |  | *     |       |       |       |       |   |   |
| No mutations |  |  |  |  |  |       |       |       |       |       | * |   |
| No mutations |  |  |  |  |  |       |       |       |       |       |   | * |
|              |  |  |  |  |  | P21L  | *     |       |       |       |   |   |
|              |  |  |  |  |  | M20I  | *     |       |       |       |   |   |
|              |  |  |  |  |  | W30C  | W30C  | *     |       |       |   |   |
|              |  |  |  |  |  | L28R  | L28R  | L28R  | *     |       |   |   |
|              |  |  |  |  |  | F153S | F153S | F153S | *     |       |   |   |
|              |  |  |  |  |  | D27E  | D27E  | D27E  | D27E  | *     |   |   |
|              |  |  |  |  |  | F153S | F153S | F153S | F153S | *     |   |   |
|              |  |  |  |  |  | W30G  | W30G  | W30G  | W30G  | *     |   |   |
|              |  |  |  |  |  | D27E  | D27E  | D27E  | D27E  | F153S | * |   |
|              |  |  |  |  |  | D27E  | D27E  | D27E  | D27E  | F153S | * |   |

24 48 72 96 120 144 168  
Time (h)

24 48 72 96 120 144 168  
Time (h)

**Figure S2. Cells lacking Mfd show fewer and delayed resistance-conferring mutations, Related to Figure 2, Figure S3, and Table S1**

(A) Sequencing of *rpoB* was performed at each time point from rifampicin evolution assays to identify mutations that confer resistance in WT and  $\Delta mfd$  strains of *S. typhimurium* (12 replicates per strain). (B) Sequencing of *folA* was performed at each time point from trimethoprim evolution assays to identify mutations that confer resistance in WT and  $\Delta mfd$  strains of *S. typhimurium* (12 replicates per strain). Shown are the position and corresponding amino acid changes. \*Indicates replicates sequenced by whole genome sequencing.

## Figure S3

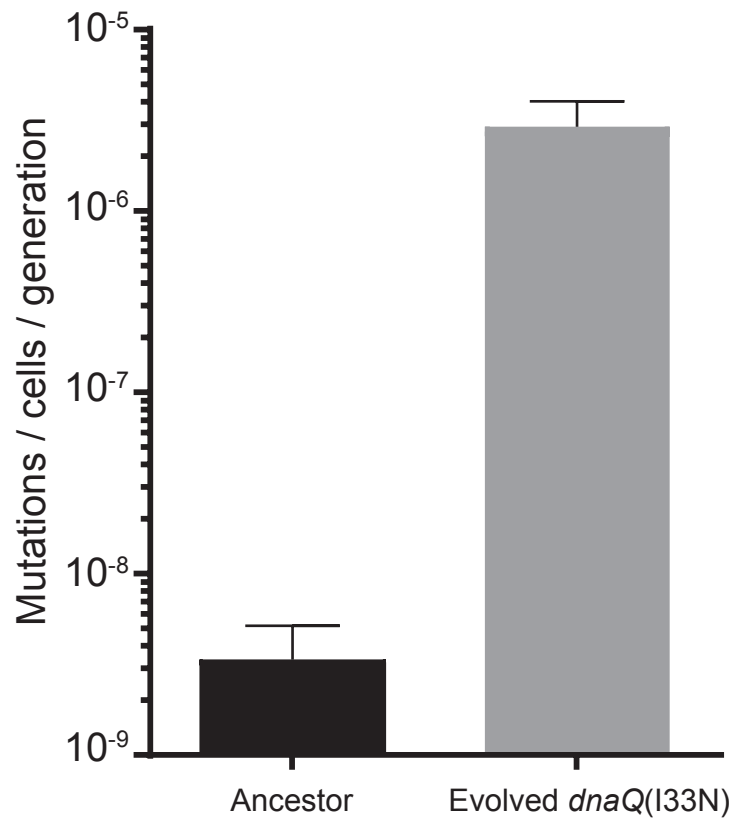

**Figure S3. Development of hypermutation in evolved WT strains of *S. typhimurium*, Related to Figure 2, Figure S2, and Table S1**

Mutation rate analysis of *S. typhimurium* strains evolved to trimethoprim. Assays were performed on rifampicin plates as described in Figure 1. The individual ancestor and evolved WT (containing a *dnaQ*133N mutation) isolates used in this experiment are indicated in Table S1. The number of replicates per isolate is 12.

# Figure S4

## A

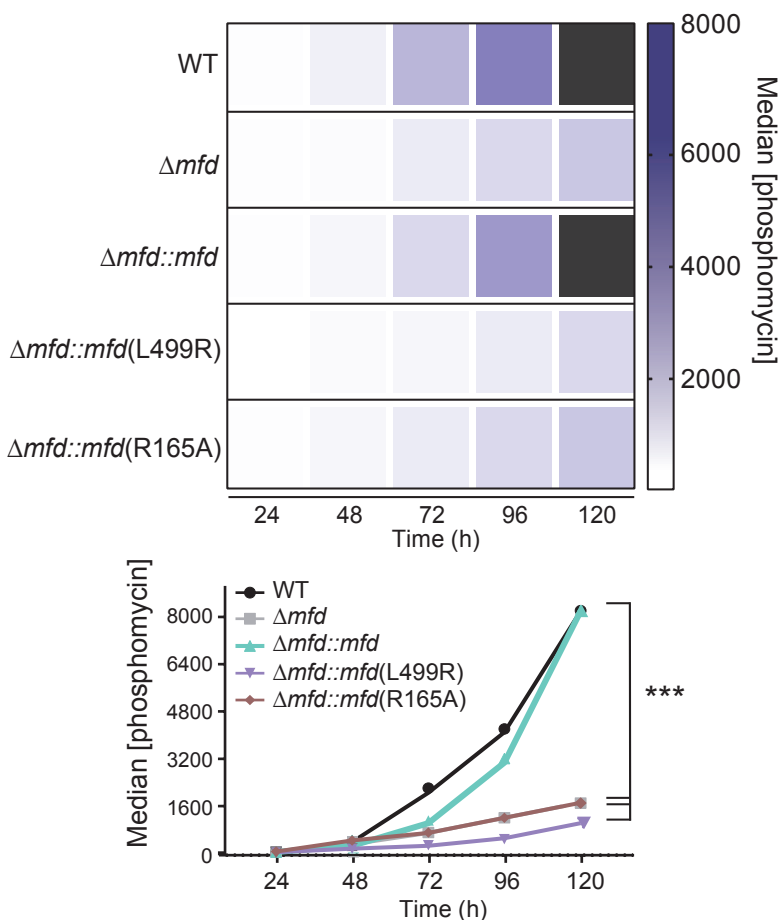

## B

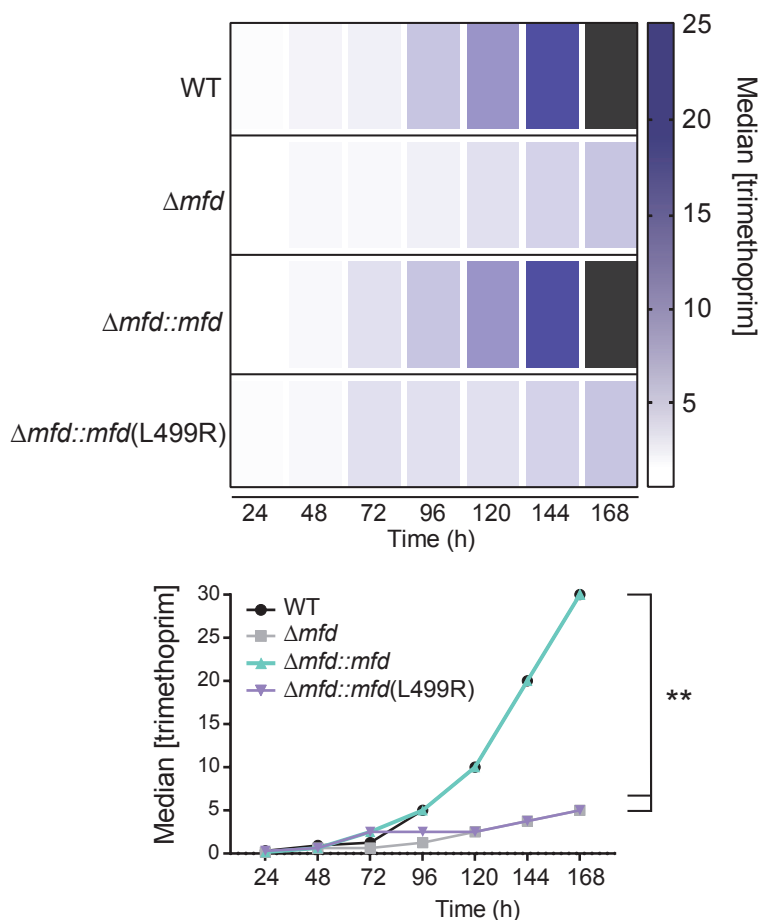

**Figure S4. Mfd requires interaction with RNAP and UvrA to promote evolution to antibiotics, Related to Figure 4**

Evolution of indicated *S. typhimurium* ST19 strains to phosphomycin (A) and trimethoprim (B). Plots and statistical testing for evolution assays were performed as described in Figure 2. \*\*\*p-value < 0.001 between WT and  $\Delta mfd$ , between WT and  $\Delta mfd::mfd(L499R)$ , and between WT and  $\Delta mfd::mfd(R165A)$  strains for evolution to phosphomycin. \*\*p-value < 0.01 between WT and  $\Delta mfd$  and between WT and  $\Delta mfd::mfd(L499R)$  strains for evolution to trimethoprim. n = 12-24 replicates per strain.

Figure S5

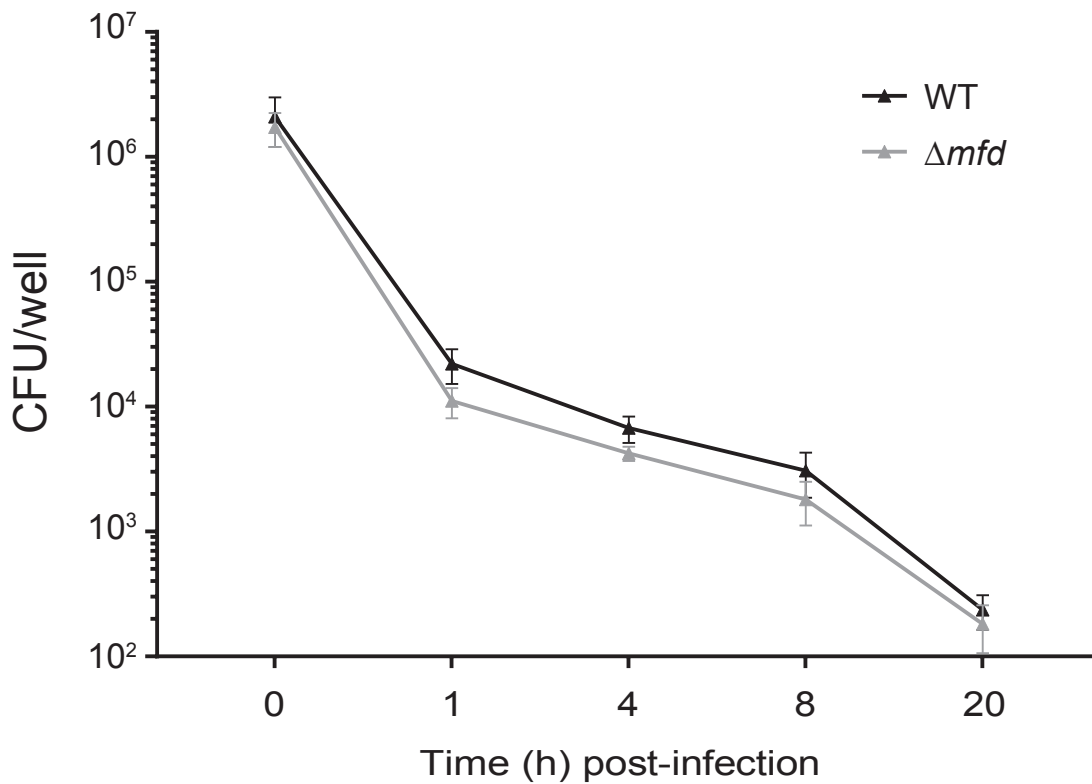

**Figure S5. Strains lacking Mfd show no survival defects in bone marrow macrophages, Related to Figure 1**

Murine-derived bone marrow macrophages (BMMs) were infected with WT and  $\Delta mfd$  strains of *S. typhimurium* ST19 and harvested for CFU enumeration at indicated times points. Data represents two independent experiments with triplicate samples for each given experiment. Error bars indicate s.e.m.
